# Supplementary material
Source: MDPI journal article supplement (https://www.mdpi.com/2304-6740/11/2/77)
Supplement: s1 [file s1]

# Supramolecular Host-Guest Assemblies of $[M_6Cl_{14}]^{2-}$ , $M = Mo, W$ Clusters with $\gamma$ -Cyclodextrin for the Development of CLUSPOMs

Anton A. Ivanov,<sup>1</sup> Pavel A. Abramov,<sup>1,\*</sup> Mohamed Haouas,<sup>2</sup> Yann Molard,<sup>3</sup> Stéphane Cordier,<sup>3</sup> Clément Falaise,<sup>2</sup> Emmanuel Cadot,<sup>2</sup> and Michael A. Shestopalov<sup>1</sup>

<sup>1</sup> Nikolaev Institute of Inorganic Chemistry SB RAS, Novosibirsk 630090, Russia

<sup>2</sup> Institut Lavoisier de Versailles, UMR 8180 CNRS, UVSQ, Université Paris-Saclay, 78035 Versailles, France

<sup>3</sup> Université de Rennes, CNRS, ISCR—UMR 6226, ScanMAT—UAR 2025, 35000 Rennes, France

\* Correspondence: [abramov@niic.nsc.ru](mailto:abramov@niic.nsc.ru)

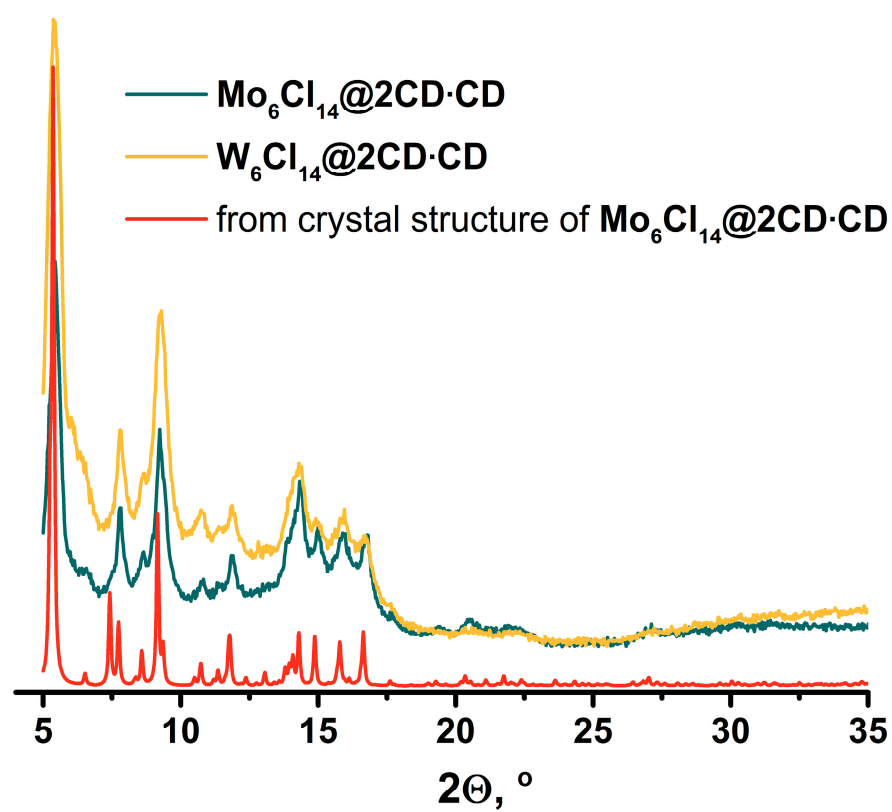

**Figure S1.** Powder patterns of  $\text{Mo}_6\text{Cl}_{14}@2\text{CD}\cdot\text{CD}$  and  $\text{W}_6\text{Cl}_{14}@2\text{CD}\cdot\text{CD}$  in comparison with theoretical one constructed from SCXRD data for  $\text{Mo}_6\text{Cl}_{14}@2\text{CD}\cdot\text{CD}$ .

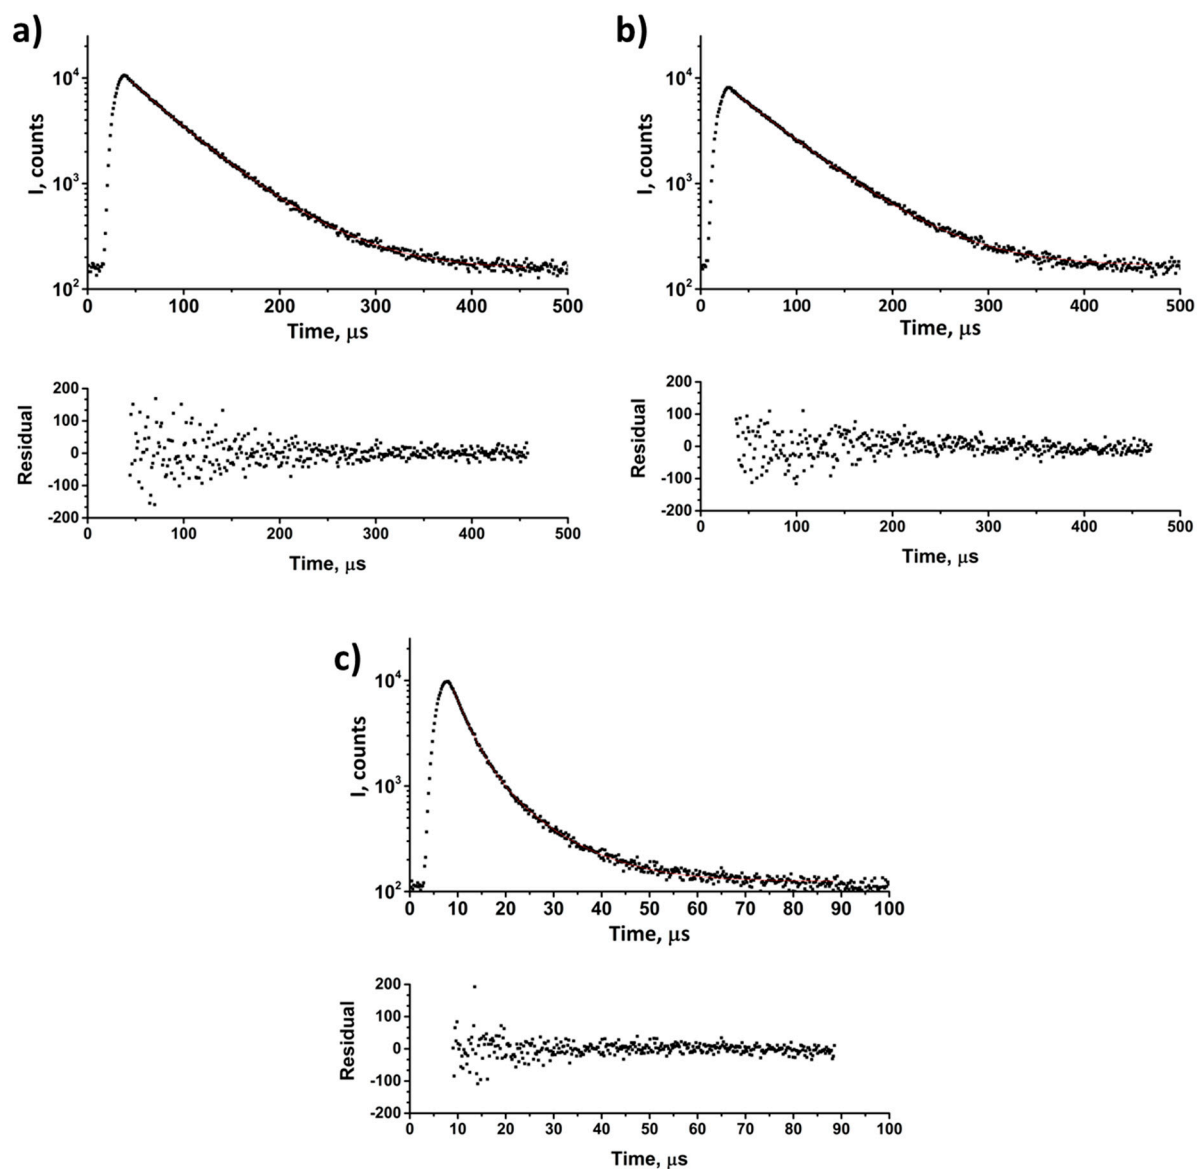

**Figure S2.** Luminescence decay curves of  $\text{Mo}_6\text{Cl}_{14}$  (a),  $\text{Mo}_6\text{Cl}_{14}@2\text{CD}\cdot\text{CD}$  (b) and  $\text{W}_6\text{Cl}_{14}$  (c) in solid state.  $\chi^2 = 0.99962, 0.99959$  and  $0.99964$  correspondingly.

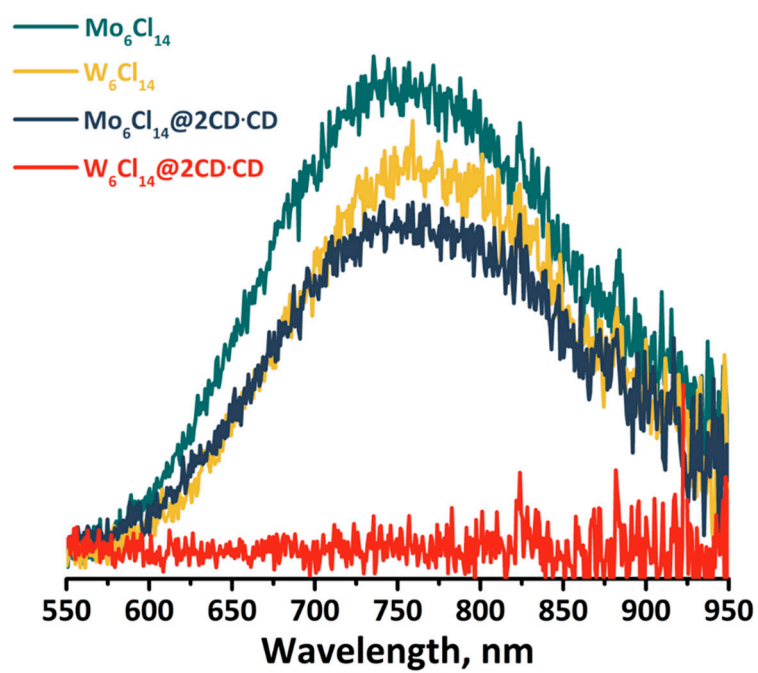

**Figure S3.** Emission spectra of compounds in solid state.

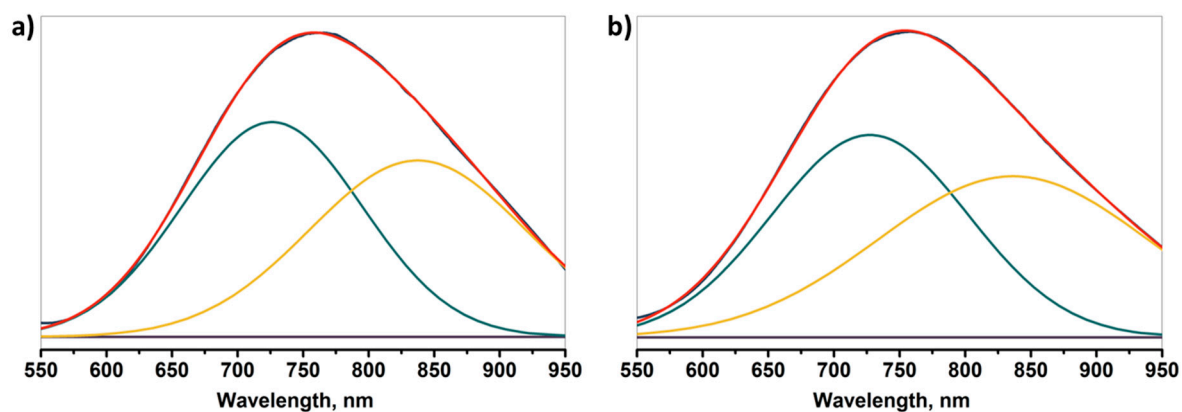

**Figure S4.** Deconvolution of the emission spectra of **Mo<sub>6</sub>Cl<sub>14</sub>** (a) and **Mo<sub>6</sub>Cl<sub>14</sub>@2CD·CD** (b) in solid state.

**Table S1.** Peak positions, relative contributions and coefficient of determination  $R^2$  of **Mo<sub>6</sub>Cl<sub>14</sub>** and **Mo<sub>6</sub>Cl<sub>14</sub>@2CD·CD** of the two Voigt components of the fitted emission spectra in Fig. S4.

| Compound                                    | Peak, nm | Relative contribution | $R^2$  |
|---------------------------------------------|----------|-----------------------|--------|
| <b>Mo<sub>6</sub>Cl<sub>14</sub></b>        | 726      | 0.522                 | 0.9998 |
|                                             | 837      | 0.478                 |        |
| <b>Mo<sub>6</sub>Cl<sub>14</sub>@2CD·CD</b> | 727      | 0.503                 | 0.9998 |
|                                             | 836      | 0.497                 |        |

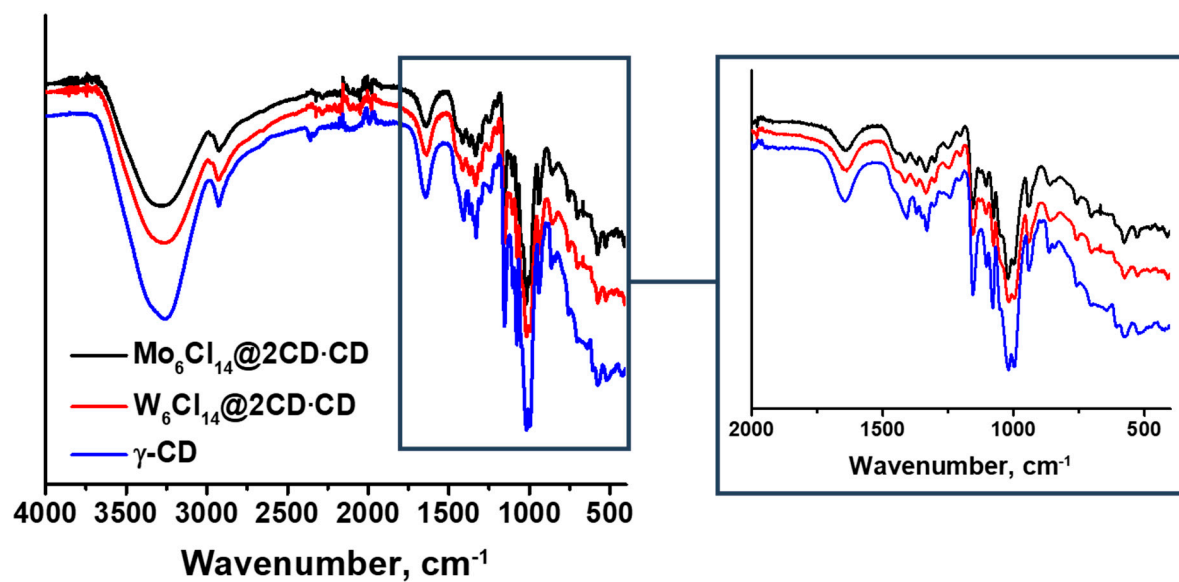

Figure S5. FTIR spectra of  $\text{Mo}_6\text{Cl}_{14}@2\text{CD}\cdot\text{CD}$  and  $\text{W}_6\text{Cl}_{14}@2\text{CD}\cdot\text{CD}$  in comparison with  $\gamma\text{-CD}$ .

**Table S2.** Selected crystallographic parameters of the single-crystal X-ray diffraction structural analysis for  $(\text{H}_3\text{O})_2\{[\text{Mo}_6\text{Cl}_8\text{Cl}_6]@(\gamma\text{-CD})_2\}\cdot 2((\text{H}_3\text{O})_2[\text{Mo}_6\text{Cl}_8\text{Cl}_6])\cdot 15\text{H}_2\text{O}$  (**Mo<sub>6</sub>Cl<sub>14</sub>@2CD·2Mo<sub>6</sub>Cl<sub>14</sub>**),  $(\text{H}_3\text{O})_2\{[\text{Mo}_6\text{Cl}_8\text{Cl}_6]@(\gamma\text{-CD})_2\}\cdot (\gamma\text{-CD})\cdot 15\text{H}_2\text{O}$  (**Mo<sub>6</sub>Cl<sub>14</sub>@2CD·CD**) and  $(\text{H}_3\text{O})_2\{[\text{W}_6\text{Cl}_8\text{Cl}_6]@(\gamma\text{-CD})_2\}\cdot 0.5((\text{H}_3\text{O})_2[\text{W}_6\text{Cl}_8\text{Cl}_6])\cdot 15\text{H}_2\text{O}$  (**W<sub>6</sub>Cl<sub>14</sub>@2CD·0.5W<sub>6</sub>Cl<sub>14</sub>**)

|                                                                                    | <b>Mo<sub>6</sub>Cl<sub>14</sub>@2CD·2Mo<sub>6</sub>Cl<sub>14</sub></b>                                                                                                                    | <b>Mo<sub>6</sub>Cl<sub>14</sub>@2CD·CD</b>                                                                                                                                                                                                                   | <b>W<sub>6</sub>Cl<sub>14</sub>@2CD·0.5W<sub>6</sub>Cl<sub>14</sub></b>                                                                                                                    |
|------------------------------------------------------------------------------------|--------------------------------------------------------------------------------------------------------------------------------------------------------------------------------------------|---------------------------------------------------------------------------------------------------------------------------------------------------------------------------------------------------------------------------------------------------------------|--------------------------------------------------------------------------------------------------------------------------------------------------------------------------------------------|
| Chemical formula                                                                   | C <sub>96</sub> H <sub>110</sub> Cl <sub>42</sub> Mo <sub>18</sub> O <sub>97</sub>                                                                                                         | C <sub>144</sub> H <sub>168</sub> Cl <sub>114</sub> Mo <sub>6</sub> O <sub>140</sub>                                                                                                                                                                          | C <sub>192</sub> H <sub>224</sub> Cl <sub>42</sub> O <sub>189.60</sub> W <sub>18</sub>                                                                                                     |
| <i>M<sub>r</sub></i>                                                               | 6031.65                                                                                                                                                                                    | 5210.71                                                                                                                                                                                                                                                       | 10363.50                                                                                                                                                                                   |
| Crystal system, space group                                                        | Triclinic, <i>P</i> 1                                                                                                                                                                      | Tetragonal, <i>P</i> 4 <sub>2</sub> 12                                                                                                                                                                                                                        | Tetragonal, <i>I</i> 422                                                                                                                                                                   |
| Temperature (K)                                                                    | 130                                                                                                                                                                                        | 200                                                                                                                                                                                                                                                           | 130                                                                                                                                                                                        |
| <i>a</i> , <i>b</i> , <i>c</i> (Å)                                                 | 17.8167 (3), 17.9076 (3), 19.7519 (4)                                                                                                                                                      | 23.806 (1), 23.806 (1), 22.831 (1)                                                                                                                                                                                                                            | 35.7254 (5), 35.7254 (5), 34.3472 (12)                                                                                                                                                     |
| $\alpha$ , $\beta$ , $\gamma$ (°)                                                  | 116.936 (2), 116.807 (2), 90.012 (1)                                                                                                                                                       | 90, 90, 90                                                                                                                                                                                                                                                    | 90, 90, 90                                                                                                                                                                                 |
| <i>V</i> (Å <sup>3</sup> )                                                         | 4846.01 (19)                                                                                                                                                                               | 12938.9 (12)                                                                                                                                                                                                                                                  | 43837 (2)                                                                                                                                                                                  |
| <i>Z</i>                                                                           | 1                                                                                                                                                                                          | 2                                                                                                                                                                                                                                                             | 4                                                                                                                                                                                          |
| $\mu$ (mm <sup>-1</sup> )                                                          | 1.79                                                                                                                                                                                       | 0.52                                                                                                                                                                                                                                                          | 5.04                                                                                                                                                                                       |
| Crystal size (mm)                                                                  | 0.25 × 0.20 × 0.20                                                                                                                                                                         | 0.1 × 0.1 × 0.02                                                                                                                                                                                                                                              | 0.25 × 0.25 × 0.25                                                                                                                                                                         |
| Diffractometer                                                                     | New Xcalibur, AtlasS2                                                                                                                                                                      | Bruker D8 VENTURE                                                                                                                                                                                                                                             | New Xcalibur, AtlasS2                                                                                                                                                                      |
| Absorption correction                                                              | Multi-scan <i>CrysAlis PRO</i> 1.171.41.123a (Rigaku Oxford Diffraction, 2022) Empirical absorption correction using spherical harmonics, implemented in SCALE3 ABSPACK scaling algorithm. | Multi-scan <i>SADABS2016/2</i> (Bruker, 2016/2) was used for absorption correction. <i>w</i> R2(int) was 0.1213 before and 0.1053 after correction. The Ratio of minimum to maximum transmission is 0.8080. The <i>l</i> /2 correction factor is Not present. | Multi-scan <i>CrysAlis PRO</i> 1.171.41.123a (Rigaku Oxford Diffraction, 2022) Empirical absorption correction using spherical harmonics, implemented in SCALE3 ABSPACK scaling algorithm. |
| <i>T<sub>min</sub></i> , <i>T<sub>max</sub></i>                                    | 0.977, 1.000                                                                                                                                                                               | 0.603, 0.746                                                                                                                                                                                                                                                  | 0.479, 1.000                                                                                                                                                                               |
| No. of measured, independent and observed [ <i>I</i> > 2σ( <i>I</i> )] reflections | 85634, 44790, 42664                                                                                                                                                                        | 257159, 11500, 10490                                                                                                                                                                                                                                          | 45883, 16744, 10452                                                                                                                                                                        |
| <i>R<sub>int</sub></i>                                                             | 0.023                                                                                                                                                                                      | 0.122                                                                                                                                                                                                                                                         | 0.076                                                                                                                                                                                      |
| $\theta_{\text{max}}$ (°)                                                          | 29.7                                                                                                                                                                                       | 25.1                                                                                                                                                                                                                                                          | 23.8                                                                                                                                                                                       |
| (sin $\theta/\lambda$ ) <sub>max</sub> (Å <sup>-1</sup> )                          | 0.697                                                                                                                                                                                      | 0.596                                                                                                                                                                                                                                                         | 0.568                                                                                                                                                                                      |

|                                                         |                                                                                              |                                                                                             |                                                                                                                                               |
|---------------------------------------------------------|----------------------------------------------------------------------------------------------|---------------------------------------------------------------------------------------------|-----------------------------------------------------------------------------------------------------------------------------------------------|
| Range of $h, k, l$                                      | $-24 \leq h \leq 24, -24 \leq k \leq 24,$<br>$-26 \leq l \leq 25$                            | $-28 \leq h \leq 28, -28 \leq k \leq 28,$<br>$-27 \leq l \leq 27$                           | $-40 \leq h \leq 40, -30 \leq k \leq 38, -$<br>$30 \leq l \leq 39$                                                                            |
| $R[F^2 > 2\sigma(F^2)], wR(F^2),$<br>$S$                | 0.144, 0.320, 1.09                                                                           | 0.075, 0.220, 1.04                                                                          | 0.066, 0.192, 1.03                                                                                                                            |
| No. of reflections,<br>parameters,<br>restraints        | 44790, 1314, 5                                                                               | 11500, 740, 0                                                                               | 16744, 958, 55                                                                                                                                |
| Weighting scheme                                        | $w = 1/[\sigma^2(F_o^2) + (0.0215P)^2 +$<br>$478.8877P]$ +<br>where $P = (F_o^2 + 2F_c^2)/3$ | $w = 1/[\sigma^2(F_o^2) + (0.1333P)^2 +$<br>$49.8256P]$ +<br>where $P = (F_o^2 + 2F_c^2)/3$ | $w = 1/[\sigma^2(F_o^2) +$<br>$(0.0787P)^2 + 957.9431P]$<br>where $P = (F_o^2 + 2F_c^2)/3$                                                    |
| $\Delta Q_{\max}, \Delta Q_{\min}$ (e Å <sup>-3</sup> ) | 4.98, -3.69                                                                                  | 1.35, -1.15                                                                                 | 3.18, -1.56                                                                                                                                   |
| Absolute structure                                      | Refined as an inversion<br>twin.                                                             | Refined as an inversion<br>twin.                                                            | Flack $x$ determined<br>using 3699 quotients<br>[(I+)-(I-)]/[(I+)+(I-)]<br>(Parsons, Flack and<br>Wagner, Acta Cryst. B69<br>(2013) 249-259). |
| Absolute structure<br>parameter                         | 0.28 (11)                                                                                    | 0.07 (7)                                                                                    | -0.023 (7)                                                                                                                                    |

Computer programs: *CrysAlis PRO* 1.171.41.123a (Rigaku OD, 2022), *SAINT* v8.37A (Bruker, 2015), *SHELXT* 2014/5 (Sheldrick, 2014), *SHELXT* (Sheldrick, 2015), *SHELXL2017/1* (Sheldrick, 2017), *SHELXL* 2018/3 (Sheldrick, 2015), *Olex2* 1.5 (Dolomanov et al., 2009).
